# Supplementary material
Source: PubMed Central journal article supplement (PMC5340582)

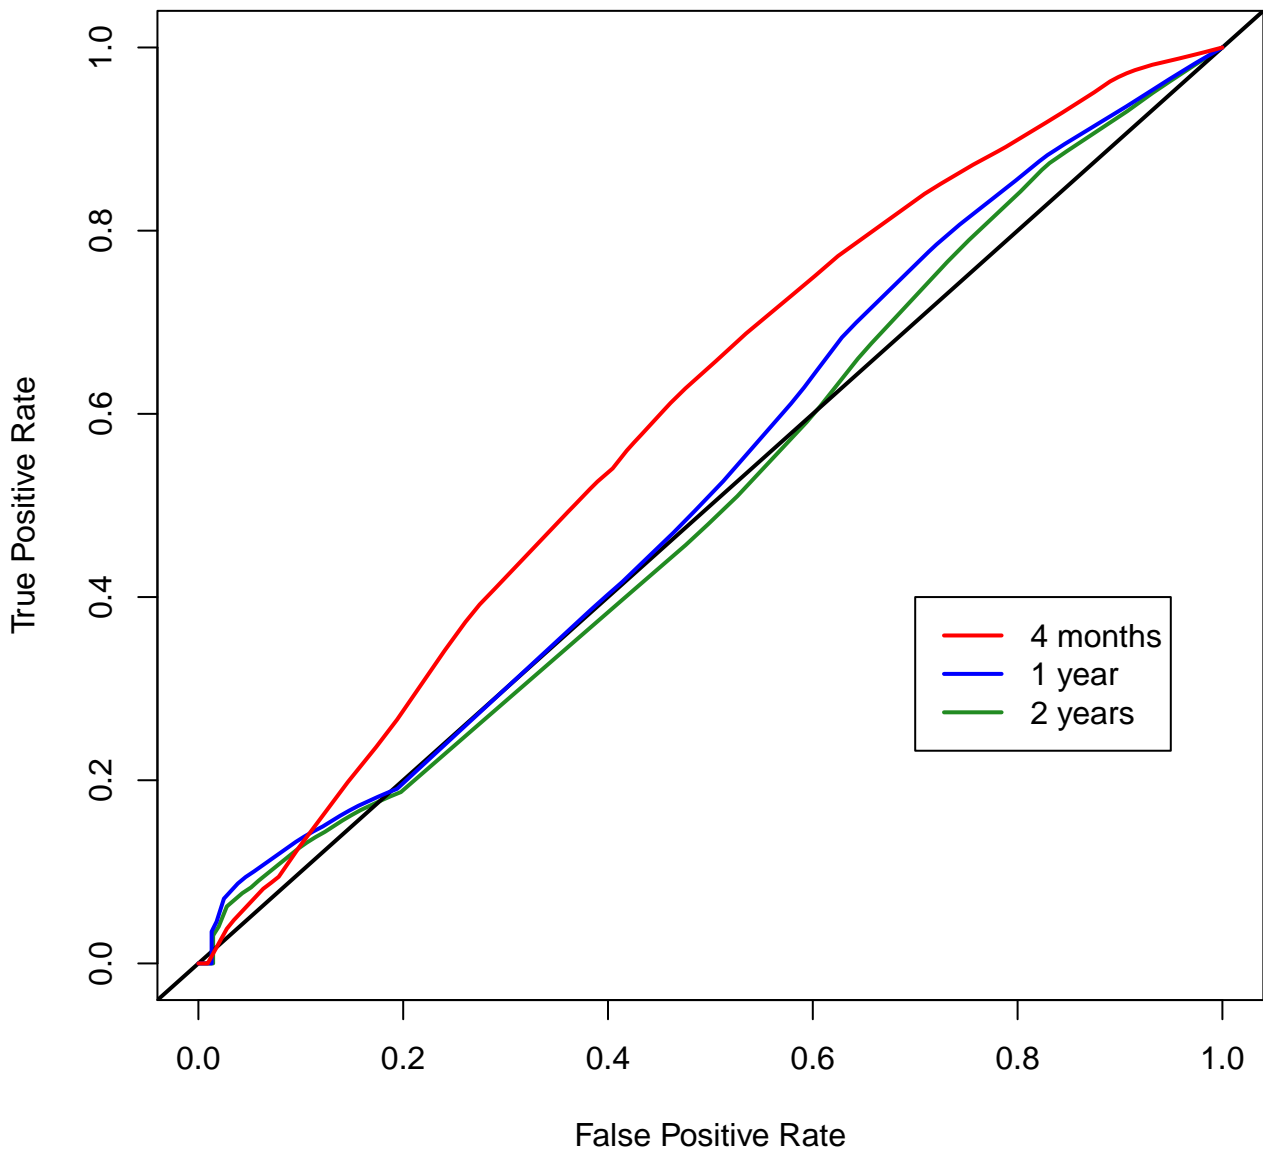

Supplement: NIHMS841480-supplement-Supplemental_Figure_1.pdf [file NIHMS841480-supplement-Supplemental_Figure_1.pdf]
